# Supplementary material for: Surfactant-free synthesis of fluorescent platinum nanoclusters using HEPES buffer for hypochlorous acid sensing and imaging
Source: Royal Society of Chemistry journal article supplement (doi:10.1039/d1ra09064j), 2022-01-01
Supplement: d1ra09064j1.pdf [file d1ra09064j1.pdf]

## Supplementary Information

### Surfactant-Free Synthesis of Fluorescent Platinum Nanocluster Using HEPES

#### Buffer for Hypochlorous Acid Sensing and Imaging

*Xiaoying Wang<sup>b</sup>, Yusong Wang<sup>a</sup>, Liping Yin<sup>a</sup>, Qiang Zhang<sup>\*b</sup> and Shaozhen Wang<sup>\*a</sup>*

[\*] X. Wang, Y. Wang, L. Yin, Q. Zhang, and Prof. Dr. S. Wang

<sup>a</sup>Anhui Provincial Engineering Research Center for Polysaccharide Drugs and Institute of Synthesis and Application of Medical Materials, Department of Pharmacy, Wannan Medical College, Wuhu 241002, P.R. China.

<sup>b</sup>Laboratory of Functionalized Molecular Solids, Ministry of Education, Anhui Key Laboratory of Chemo/Biosensing, College of Chemistry and Materials Science, Anhui Normal University, Wuhu 241002, P. R. China.

\*Corresponding author. *E-mail:* wangshaozhen@wnmc.edu.cn.

### *Reagents and Instrumental*

NaCl (AR,  $\geq 99.5\%$ ), KCl (AR,  $\geq 99.5\%$ ), AgNO<sub>3</sub> (AR,  $\geq 99.8\%$ ), CuCl<sub>2</sub>·2H<sub>2</sub>O (AR,  $\geq 99.0\%$ ), ZnSO<sub>4</sub>·7H<sub>2</sub>O (AR,  $\geq 99.5\%$ ), CaCl<sub>2</sub>·2H<sub>2</sub>O (AR), MnSO<sub>4</sub>·H<sub>2</sub>O (AR,  $\geq 99.0\%$ ), MgSO<sub>4</sub> (AR,  $\geq 98.0\%$ ), AlCl<sub>3</sub>·6H<sub>2</sub>O (AR,  $\geq 97.0\%$ ), CoSO<sub>4</sub>·7H<sub>2</sub>O (AR,  $\geq 99.5\%$ ), FeSO<sub>4</sub>·7H<sub>2</sub>O (AR), FeCl<sub>3</sub>·6H<sub>2</sub>O (AR) and H<sub>2</sub>O<sub>2</sub> (AR,  $\geq 30\%$ ) were purchased from Sinopharm Chemical Reagent Co., Ltd. (China). Glutathione (GSH), cysteine (Cys), homocysteine (Hcy), glucose, sodium hypochlorite solution (reagent grade, available chlorine 4.00-4.99%), chloroplatinic acid hexahydrate (ACS reagent), Phorbol 12-myristate 13-acetate (PMA), *N*-acetyl-L-cysteine (NAC) and lipopolysaccharide (LPS) were purchased from Sigma-Aldrich Co. Ltd. (U.S.A.). HEPES buffer (1 M, pH 7.2- 7.4) was purchased from Beijing Soleibao Technology Co., Ltd. All aqueous solutions were prepared by deionized water (18.25 M $\Omega$ ·cm).

TEM (Transmission electron microscopic) images were obtained with a Hitachi HT 7700 TEM instrument. The fluorescence and UV absorption spectra were acquired by a Hitachi F-2500 fluorescence spectrophotometer and Hitachi U-3900 spectrophotometer, respectively. The zeta potential was obtained with a Malvern Zetasizer Nano. The representative fluorescence images were in bottles were acquired by a Fusion FX7 imaging instrument (VILBER). The confocal fluorescence images were carried out on a confocal laser scanning microscope (TCS SP8, Leica, Germany).

**Table S1.** Comparison of other nanoprobes for sensing of ClO<sup>-</sup>.

| Nanoprobes                                          | Surface group           | Linear Range ( $\mu$ M) | Synthesis steps              | Application      | References                                                     |
|-----------------------------------------------------|-------------------------|-------------------------|------------------------------|------------------|----------------------------------------------------------------|
| CdSe-ZnS quantum dots                               | Poly-NHMe               | 0-0.83                  | Three steps                  | Cells imaging    | <i>Anal. Chem.</i> 2010, <b>82</b> , 9775–9781.                |
| N-doped carbon dots                                 | GSH                     | 60-150                  | One step                     | Cells imaging    | <i>Analyst</i> , 2018, <b>143</b> , 5834-5840.                 |
| Cu NCs                                              | PVP                     | 0-6                     | Two steps                    | Tap water sample | <i>ACS Appl. Nano Mater.</i> 2020, <b>3</b> , 312-318.         |
| Au NCs                                              | BSA                     | 0.8-800                 | One step                     | Tap water sample | <i>Talanta</i> , 2015, <b>132</b> , 790-795.                   |
| CD/CCM@ZIF-8                                        | --                      | 0.1-50                  | Two steps                    | Serum sample     | <i>Anal. Chem.</i> <b>2020</b> , <i>92</i> , 3447-3454.        |
| PFOBT <sub>36</sub> SeTBT <sub>5</sub> Polymer dots | PEG                     | 0-250                   | Multi-step organic synthesis | Cell imaging     | <i>J. Am. Chem. Soc.</i> <b>2017</b> , <i>139</i> , 6911-6918. |
| MoS <sub>2</sub> quantum dots                       | GSH                     | 5-500                   | One step                     | Tap water sample | <i>Microchimica Acta</i> , 2018, <b>185</b> , 233.             |
| Pt NCs                                              | Hepes (Surfactant-free) | 5-160                   | One step                     | Cell imaging     | This work.                                                     |

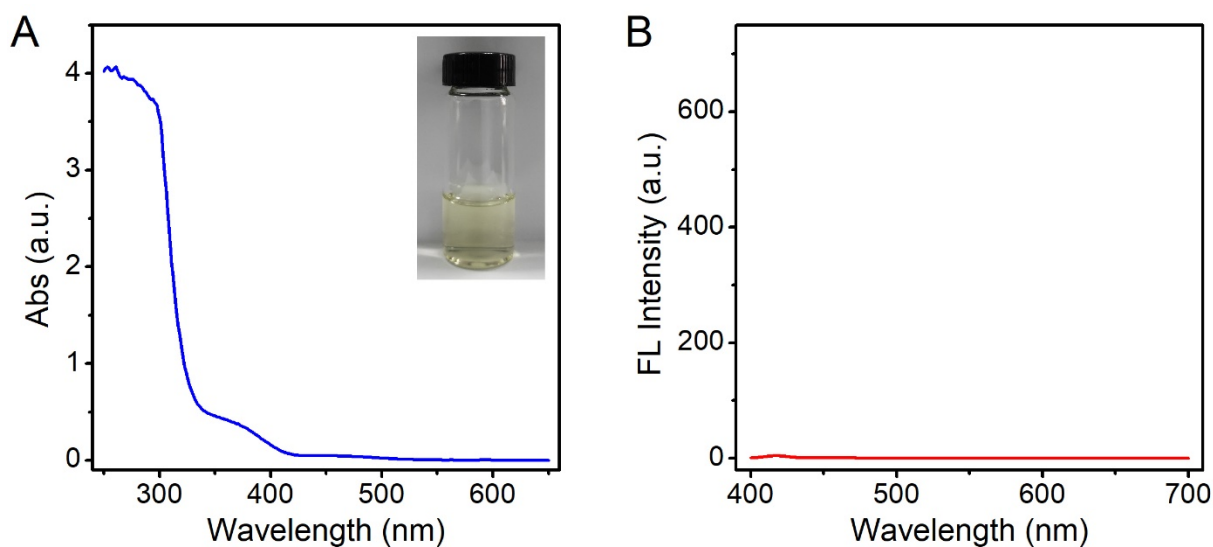

**Figure S1.** The absorption spectrum (A) and fluorescence spectrum (B) at 0 h reaction time.

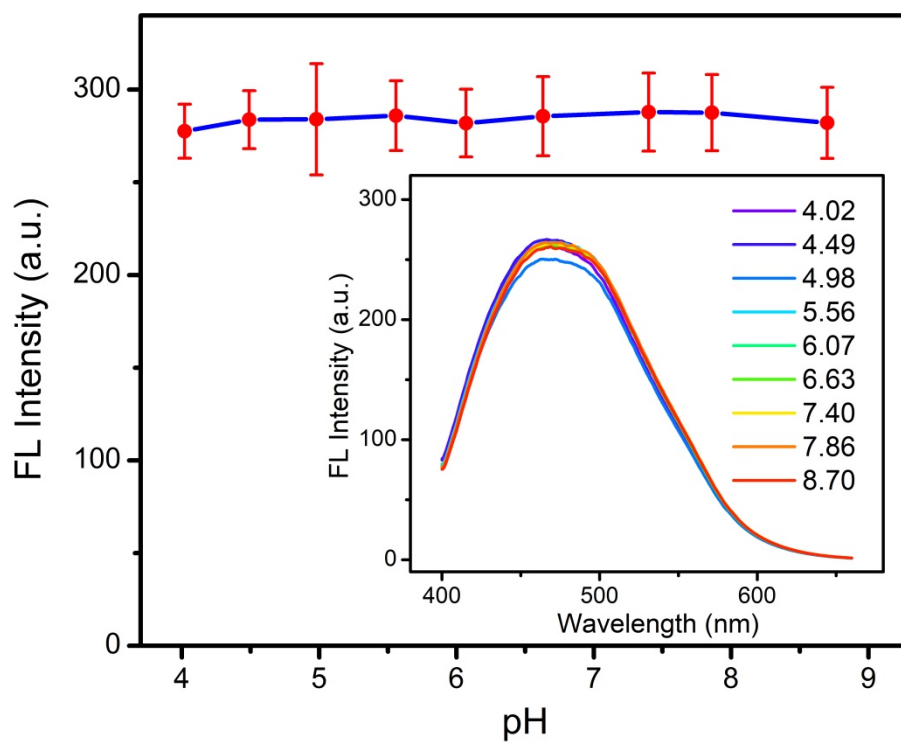

**Figure S2.** The relationship between the fluorescence intensity and pH value in 10 mM PBS buffer.

The inset is the pH-dependent fluorescence spectra of Pt NCs.

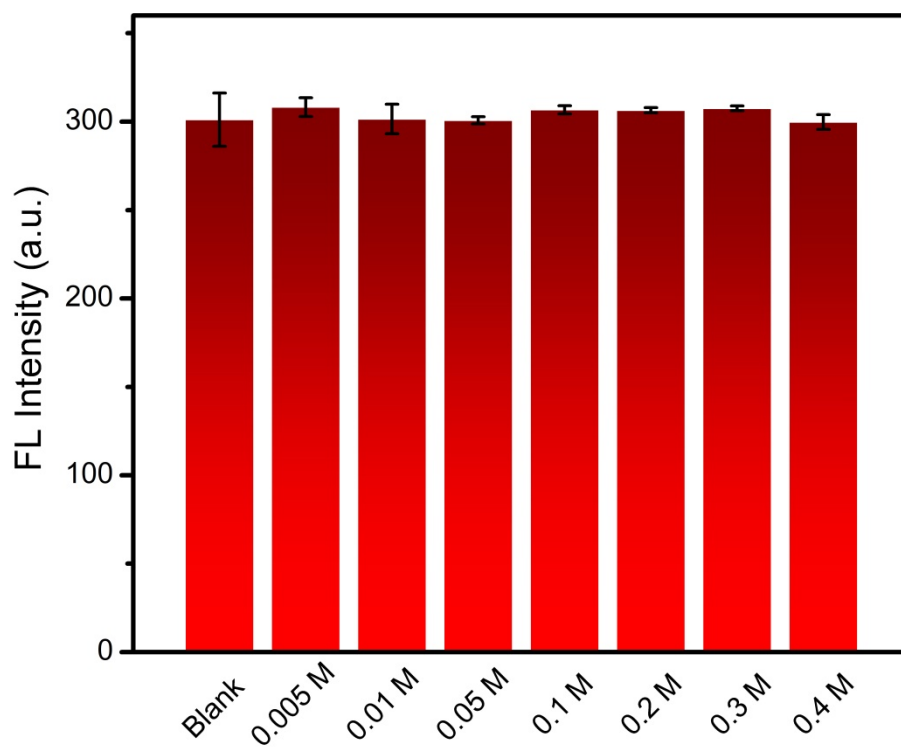

**Figure S3.** The dependence of ionic strength ( $I$ ) on the fluorescence intensity of Pt NCs.

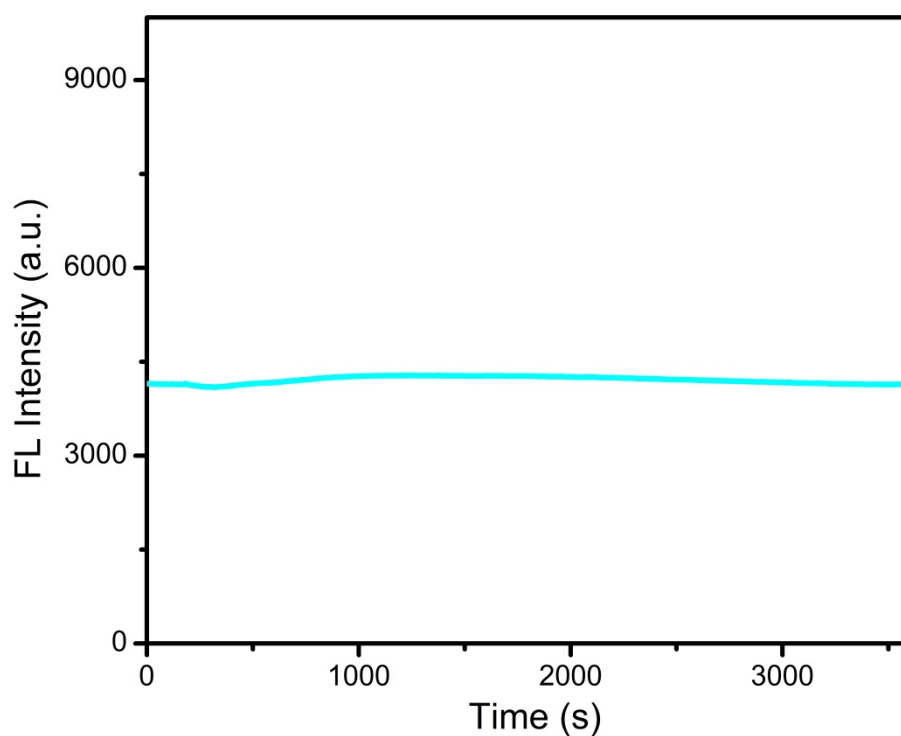

**Figure S4.** Photostability experiment of the Pt NCs in PBS buffer (10 mM, pH= 7.4). Voltage of xenon lamp: 700 V, slit:  $15 \times 15$ . Ex=405 nm. The concentration of Pt NCs is 10  $\mu\text{g}/\text{mL}$ .
